# Supplementary material
Source: PubMed Central journal article supplement (PMC10524993)
Supplement: NIHMS1902613-supplement-1.pdf [file NIHMS1902613-supplement-1.pdf]

**Supplementary Table 1.** Associations of predictor variables with presence of gastric intestinal metaplasia (GIM) and extensive GIM (i.e., involving both antrum and corpus) among 580 GIM cases (of which 163 with extensive GIM) and 3908 controls in the pooled MEDVAMC and CHI-St. Luke's cohorts

|                                   | GIM         |           | Extensive GIM |           |
|-----------------------------------|-------------|-----------|---------------|-----------|
|                                   | Adjusted OR | 95% CI    | Adjusted OR   | 95% CI    |
| <b>Sex</b>                        |             |           |               |           |
| Female                            | ref         | ref       | ref           | ref       |
| Male                              | 1.50        | 1.18-1.90 | 1.87          | 1.16-3.01 |
| <b>Age</b>                        |             |           |               |           |
| <60                               | ref         | ref       | ref           | ref       |
| 60-69                             | 1.84        | 1.50-2.27 | 2.68          | 1.79-4.03 |
| ≥70                               | 2.19        | 1.68-2.86 | 4.55          | 2.83-7.32 |
| <b>Race/Ethnicity</b>             |             |           |               |           |
| White                             | ref         | ref       | ref           | ref       |
| Hispanic                          | 2.19        | 1.69-2.82 | 3.89          | 2.40-6.29 |
| Black                             | 1.88        | 1.51-2.33 | 3.93          | 2.63-5.87 |
| <b>Habitual Smoker</b>            |             |           |               |           |
| No                                | ref         | ref       | ref           | ref       |
| Yes                               | 1.92        | 1.57-2.35 | 2.27          | 1.56-3.32 |
| <b><i>Helicobacter pylori</i></b> |             |           |               |           |
| No                                | ref         | ref       | ref           | ref       |
| Yes                               | 3.28        | 2.69-4.00 | 3.46          | 2.43-4.92 |

For the GIM model, Probability (GIM=yes) =  $\log \{p(\text{GIM}=1)/[1-p(\text{GIM}=1)]\} = -3.543 + 0.404*(\text{Male}) + 0.612*(\text{Age } 60-69) + 0.786*(\text{Age } \geq 70) + 0.782*(\text{Hispanic}) + 0.630*(\text{Black}) + 0.652*(\text{Habitual Smoker}) + 1.187*(H. pylori)$ . For the Extensive GIM model, Probability (Extensive GIM=yes) =  $\log \{p(\text{Extensive GIM}=1)/[1-p(\text{Extensive GIM}=1)]\} = -5.949 + 0.624*(\text{Male}) + 0.987*(\text{Age } 60-69) + 1.516*(\text{Age } \geq 70) + 1.357*(\text{Hispanic}) + 1.368*(\text{Black}) + 0.821*(\text{Habitual Smoker}) + 1.240*(H. pylori)$ .
